# Supplementary material
Source: Elsevier journal article supplement (https://www.sciencedirect.com/science/article/pii/S0025775317300428)
Supplement: mmc1 [file S0025775317300428:mmc1.pdf]

## INFORMACIÓN DE SOPORTE

### Efectos del condroitín sulfato sobre la respuesta cerebral a la estimulación dolorosa en los pacientes con artrosis de rodilla.

#### Estudio de RMf aleatorizado, doble ciego y controlado por placebo.

#### Texto S1. Métodos

##### Elegibilidad y criterios de exclusión

**Criterios de elegibilidad.** Fueron elegibles los sujetos que cumplieron todos los criterios siguientes: (i) varón o mujer con edad comprendida entre 40 y 75 años; (ii) diagnóstico de artrosis primaria e idoneidad para el estudio, según la determinación del reumatólogo responsable, basada en una amplia valoración médica; (iii) artrosis radiológica y clínica basada en los criterios de ACR (American College of Rheumatology);[1] (iv) grado II o III de artrosis radiológica;[2] (v) [síntomas de la rodilla estables al menos desde un mes antes del cribado](#); y (v) severidad mínima de dolor de rodilla de 5 puntos en la escala de calificación numérica de 11 puntos (NRS) [en situación](#) basal.

**Criterios de exclusión:** (i) evidencia clínica o historia de adicción a drogas/alcohol; (ii) efectos adversos previos al CS; (iii) enfermedad relevante, y no controlada, médica o psiquiátrica; (iv) contraindicación formal de RM; (v) dolor severo en otras articulaciones; (vi) enfermedades inflamatorias o sistémicas con repercusión potencial en las articulaciones; (vii) causas secundarias de artrosis de rodilla; (viii) uso de cualquier analgésico, inhibidor de ciclooxigenasa-2 (COX-2) o fármacos antiinflamatorios no esteroideos (AINES) durante los siete días previos a la inclusión en el estudio, o durante el mismo; (ix) uso sistémico o inyección local de corticosteroides durante los tres meses previos al estudio, o durante el mismo; (x) uso de CS, diacereína, glucosamina u otros fármacos de acción lenta para la artrosis durante los tres meses previos al estudio; (xi) inyección de ácido hialurónico en la rodilla seleccionada dentro de los seis meses previos al estudio; (xii) sujetos fumadores de más de 20 cigarrillos al día; (xv) inicio o cambio de programa de fisioterapia dentro de las dos semanas previas al cribado, o durante el periodo de estudio; y (xvi) [mujeres con potencial de embarazo](#).

##### Supuestos sobre el tamaño de la muestra

Al no existir consenso acerca de la estimación del tamaño de la muestra para los estudios de RM, en el presente estudio utilizamos información previa sobre la misma temática, recolectada

por nuestro equipo de investigación. Tras valorar mediante RMf la respuesta cerebral a la estimulación del dolor por presión en 22 pacientes de fibromialgia, en comparación a los 22 sujetos control equiparados (datos no publicados), encontramos una diferencia media entre grupos de la señal de MRf en la corteza del córtex cingulado anterior de 1,75 unidades (valores beta MRf), y una desviación estándar global de 2,10 unidades. Si la diferencia real entre las situaciones es de 1,75 unidades, precisamos valorar a 24 sujetos válidos en el grupo experimental y a 24 sujetos en el grupo placebo para poder rechazar la hipótesis nula con probabilidad (poder) de 0,8. La probabilidad de error tipo I asociada a esta prueba de hipótesis nula es de 0,05. Suponiendo un 20% de abandonos durante el periodo de estudio de cuatro meses, debíamos aleatorizar a un mínimo de 60 pacientes. Se obtuvieron estimaciones sobre tamaños de muestra similares utilizando los datos de un estudio con pacientes de artrosis.[3]

### **Procedimiento de aleatorización**

Se asignó a los sujetos un número de aleatorización, siguiendo el orden cronológico por el que fueron examinados. No se sustituyeron los abandonos tras la aleatorización (no se reasignaron los números de aleatorización). El listado de aleatorización se generó utilizando el software procPlan de SAS System (versión 9.2, SAS Institute Inc., Cary, NC, EEUU <http://www.sas.com/>) en bloques que constituirían múltiplos de dos sujetos, y siguiendo un patrón 1:1. Farmacéuticos independientes dispensaron al investigador la medicación del estudio, con arreglo al listado aleatorizado, desconociendo los investigadores la asignación del tratamiento.

### **REFERENCIAS**

- 1 Altman RD. Criteria for classification of clinical osteoarthritis. *J Rheumatol Suppl* 1991; 27:10-2
- 2 Kellgren JH, Lawrence JS. Radiological assessment of osteo-arthritis. *Ann Rheum Dis* 1957;16: 494–502
- 3 Giménez M, Pujol J, Ali Z, et al. Naproxen effects on brain response to painful pressure stimulation in patients with knee osteoarthritis: a double-blind, randomized, placebo-controlled, single-dose study. *J Rheumatol*. 2014 Nov;41(11):2240-8.

## FIGURAS SUPLEMENTARIAS

**Figura S1. Figura Suplementaria 1**

Activación cerebral (pruebas  $t$  de muestra única) obtenidas durante la prueba de presión de la rodilla para ambos grupos y situaciones. La prueba generó una activación sólida de todo el sistema cerebral relacionado con el dolor. Los datos se muestran a  $P_{\text{False Discovery Rate-corrected}} < 0,05$ . La derecha en las vistas axial y coronal corresponde al hemisferio derecho.

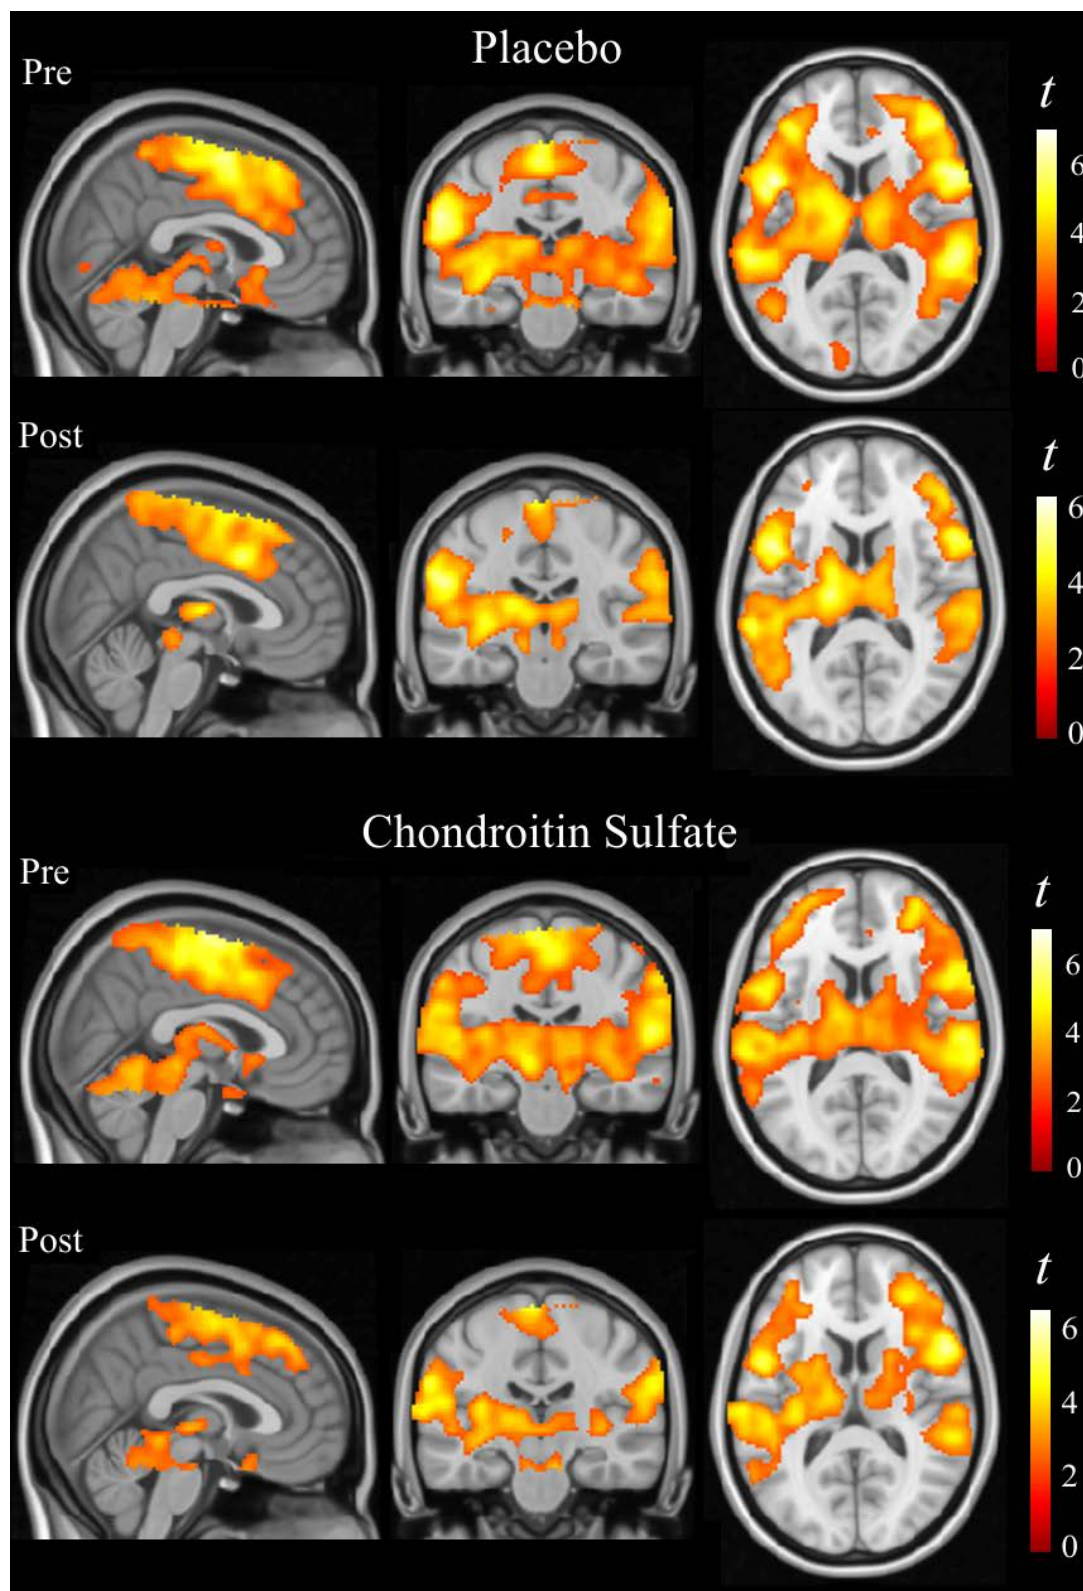

### Figura S2. Figura Suplementaria 2

Diferencias entre grupos en la activación cerebral basal durante la prueba de presión de la rótula. La derecha de las vistas axial y coronal corresponde al hemisferio derecho.

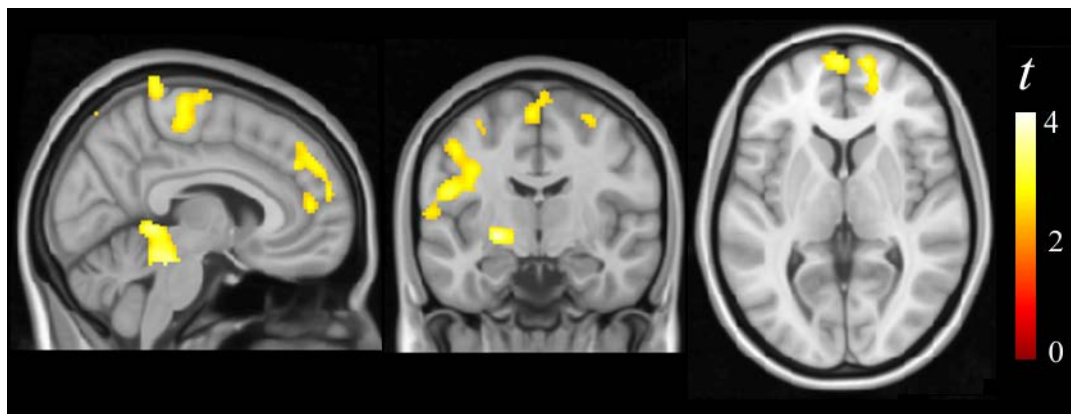

## TABLAS SUPLEMENTARIAS

Tabla S1. Tabla Suplementaria 1

T1. Resultados MRf de la prueba de presión de la interlínea de la rodilla.

|                                   | Activación máxima |     |    |     |                    |     |     |     |
|-----------------------------------|-------------------|-----|----|-----|--------------------|-----|-----|-----|
|                                   | Placebo           |     |    |     | Condroitín Sulfato |     |     |     |
| Sesión MRf basal                  | X                 | Y   | Z  | t   | x                  | y   | z   | t   |
| Corteza Sensoriomotora- SMA       | -2                | -14 | 68 | 5,8 | 0                  | -12 | 68  | 6,3 |
| SII- Ínsula posterior             | 62                | -32 | 18 | 7,0 | 64                 | -36 | 26  | 7,1 |
| Ínsula anterior-ganglios basales  | 40                | 20  | -8 | 6,0 | 38                 | 20  | -14 | 6,1 |
| Tálamo                            | -10               | -12 | 12 | 5,1 | -10                | -10 | 12  | 4,4 |
| Cingulado anterior-Medial frontal | 8                 | 10  | 40 | 5,4 | 10                 | 16  | 40  | 5,3 |
| Región PAG                        | -4                | -26 | -2 | 3,3 | 6                  | -28 | -6  | 4,1 |
| Corteza Prefrontal                | 42                | 42  | 16 | 6,1 | 46                 | 34  | -8  | 5,1 |
| Sesión MRf final                  |                   |     |    |     |                    |     |     |     |
| Corteza Sensoriomotora-SMA        | -2                | -14 | 68 | 4,3 | -6                 | -10 | 68  | 5,2 |
| SII- Ínsula Posterior             | 60                | -34 | 22 | 6,3 | 64                 | -38 | 28  | 6,6 |
| Ínsula anterior-ganglios basales  | 38                | 24  | -4 | 3,5 | 38                 | 20  | -12 | 5,8 |
| Tálamo                            | -16               | -16 | 12 | 5,2 | -14                | -16 | 8   | 4,6 |
| Cingulado anterior-Medial frontal | 2                 | 10  | 40 | 5,0 | 8                  | 12  | 44  | 4,2 |
| Región PAG                        | -6                | -28 | -6 | 3,6 | -12                | -34 | -12 | 4,3 |
| Corteza Prefrontal                | 40                | 46  | 10 | 3,8 | 32                 | 44  | 12  | 4,5 |

Todas las activaciones son  $P_{\text{False Discovery Rate-corrected}} < 0,05$ . X, Y, Z: Coordenadas del Instituto Neurológico de Montreal (MNI). SMA: Área Motora Suplementaria; SII: Segunda Corteza Somatosensorial. PAG: sustancia gris periacueductal.

Tabla S2. Tabla Suplementaria 2

## T2. Resultados MRf de la prueba de presión de la rótula

|                                      | Activación máxima   |     |     |     |                    |     |     |     |
|--------------------------------------|---------------------|-----|-----|-----|--------------------|-----|-----|-----|
|                                      | Placebo             |     |     |     | Condroitín Sulfato |     |     |     |
| Sesión MRf basal                     | X                   | Y   | z   | t   | x                  | y   | z   | T   |
| Corteza Sensoriomotora- SMA          | 0                   | -14 | 64  | 6,2 | -2                 | -12 | 64  | 7,0 |
| SII- Ínsula posterior                | 54                  | -32 | 20  | 9,5 | 52                 | -32 | 18  | 6,9 |
| Ínsula anterior-ganglios basales     | 38                  | 20  | -4  | 5,4 | 40                 | 22  | -8  | 5,9 |
| Tálamo                               | 14                  | -14 | 6   | 3,3 | -12                | -18 | 4   | 5,0 |
| Cingulado -Medial frontal            | 10                  | 8   | 42  | 4,4 | 10                 | 12  | 34  | 5,0 |
| Región PAG                           | -4                  | -28 | -5  | 2,5 | 4                  | -38 | -16 | 4,4 |
| Corteza Prefrontal                   | 40                  | 42  | 12  | 3,9 | 38                 | 52  | 16  | 5,2 |
| Sesión MRf final                     |                     |     |     |     |                    |     |     |     |
| Corteza Sensoriomotora -SMA          | -2                  | -10 | 64  | 5,1 | -4                 | -12 | 68  | 4,8 |
| SII- Ínsula posterior                | 54                  | -32 | 20  | 7,5 | 54                 | -32 | 20  | 5,7 |
| Ínsula anterior-ganglios basales     | 42                  | 24  | -8  | 3,2 | 38                 | 26  | -8  | 5,1 |
| Tálamo                               | 14                  | -14 | 6   | 3,2 | -10                | -16 | 4   | 5,1 |
| Cingulado anterior-Medial frontal    | -6                  | -6  | 44  | 4,2 | 8                  | 14  | 34  | 3,1 |
| Región PAG                           | -                   | -   | -   | -   | 8                  | -28 | -14 | 2,8 |
| Corteza Prefrontal                   | 42                  | 38  | 20  | 4,2 | 40                 | 50  | 8   | 4,4 |
| Basal>Final intra-Grupo              | Diferencias máximas |     |     |     |                    |     |     |     |
|                                      | x                   | Y   | Z   | t   | x                  | y   | z   | t   |
| Corteza sensoriomotora (278 vóxels)  | -                   | -   | -   | -   | 0                  | -6  | 70  | 2,8 |
| Grupo por interacción de sesión      | Interacción máxima  |     |     |     |                    |     |     |     |
| (CS Basal>Post)>(Placebo Basal>Post) | X                   | Y   | z   | t   | Tamaño del clúster |     |     |     |
| Región PAG                           | 0                   | -40 | -18 | 2,9 | 238                |     |     |     |

Todas las activaciones están corregidas a  $P_{\text{False Discovery Rate}} < 0,05$ . X, Y, Z: Coordenadas del Instituto Neurológico de Montreal (MNI). SMA: Área motora suplementaria; SII: Segunda corteza somatosensorial. PAG: sustancia gris periacueductal. CS: Condroitín sulfato.

Tabla S3. Tabla Suplementaria 3

T3. Resultados MRf de la prueba de presión de la rótula. Diferencias basales entre los grupos.

| Condroitín sulfato > Placebo  | Diferencias máximas |     |     |     |                    |
|-------------------------------|---------------------|-----|-----|-----|--------------------|
|                               | X                   | Y   | z   | T   | Tamaño del clúster |
| Corteza Prefrontal            | -20                 | 52  | 18  | 3,3 | 1021               |
| Tronco encefálico/Cerebelo    | -6                  | -36 | -20 | 3,9 | 1753               |
| Cortezas Sensoriomotoras- SMA | -50                 | -18 | 46  | 3,5 | 1272               |
| Ganglios basales              | -24                 | -14 | -6  | 4,1 | 295                |

Todas las diferencias son  $P_{\text{False Discovery Rate-corrected}} < 0,05$ . X, Y, Z: Coordenadas del Instituto Neurológico de Montreal (MNI). SMA: Área motora suplementaria
